# Supplementary material for: Solubility of Ca(ii), Ni(ii), Nd(iii) and Pu(iv) in the presence of proxy ligands for the degradation of polyacrylonitrile in cementitious systems
Source: Royal Society of Chemistry journal article supplement (doi:10.1039/d2dt01409b), 2022-01-01
Supplement: d2dt01409b1.pdf [file d2dt01409b1.pdf]

*Supplementary Data for*

**SOLUBILITY OF Ca(II), Ni(II), Nd(III) AND Pu(IV) IN THE PRESENCE OF PROXY  
LIGANDS FOR THE DEGRADATION OF POLYACRYLONITRILE IN CEMENTITIOUS  
SYSTEMS**

P. G. Szabo<sup>1</sup>, A. G. Tasi<sup>1,\*</sup>, X. Gaona<sup>1,\*</sup>, R. Polly<sup>1</sup>, A. Maier<sup>2</sup>, S. Hedström<sup>2</sup>, M. Altmaier<sup>1</sup>, H. Geckeis<sup>1</sup>

<sup>1</sup>Karlsruhe Institute of Technology, Institute for Nuclear Waste Disposal, P.O. Box 3640, 76021 Karlsruhe, Germany

<sup>2</sup>Svensk Kärnbränslehantering AB, Evenemangsgatan 13, Box 3091, 169 03, Solna, Sweden

\*corresponding authors.

E-mail addresses: agost.tasi@kit.edu; xavier.gaona@kit.edu

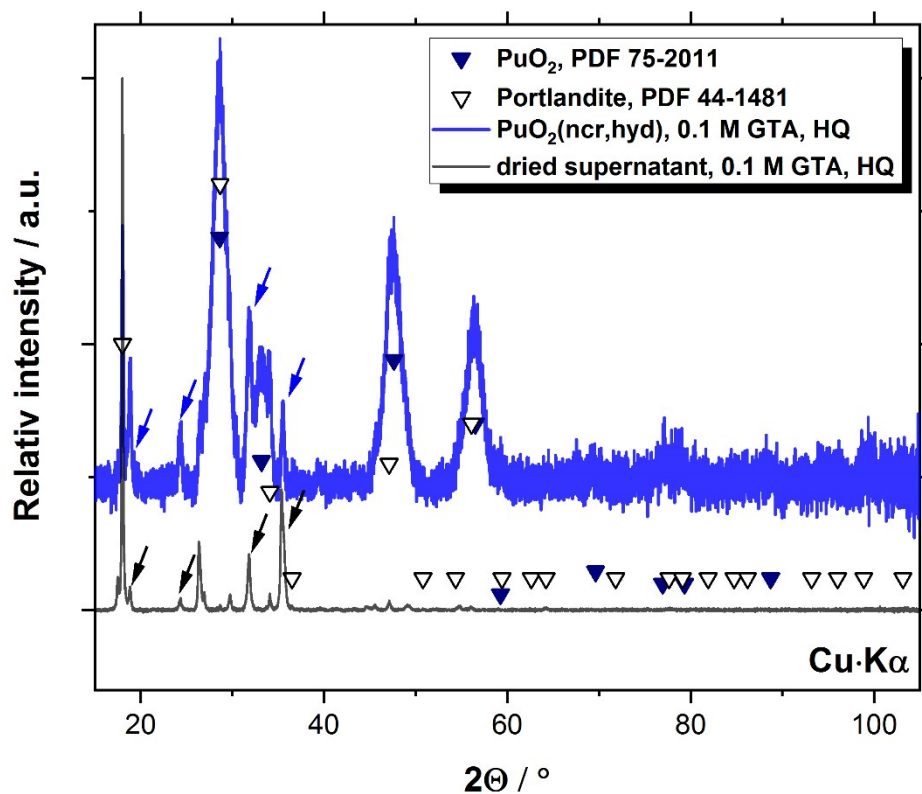

**Figure SI-1.** Blue line corresponds to the XRD pattern of the Pu(IV) solid phase after equilibration in the solubility experiments with GTA at  $[L]_{tot} = 0.1$  M and HQ as redox buffer. Black lines shows the XRD pattern of the supernatant solution dried under Ar conditions, with  $[Ca] \approx 0.02$  M and  $[Pu] \approx 10^{-11}$  M. Symbols reproduce the patterns reported for PuO<sub>2</sub>(cr) (PDF-75-2011) and portlandite (Ca(OH)<sub>2</sub>(cr), PDF-44-1481) reference materials. Blue arrows highlight those patterns coincident for the solid phase and dried supernatant, but belonging to neither PuO<sub>2</sub>(cr) nor Ca(OH)<sub>2</sub>(cr).

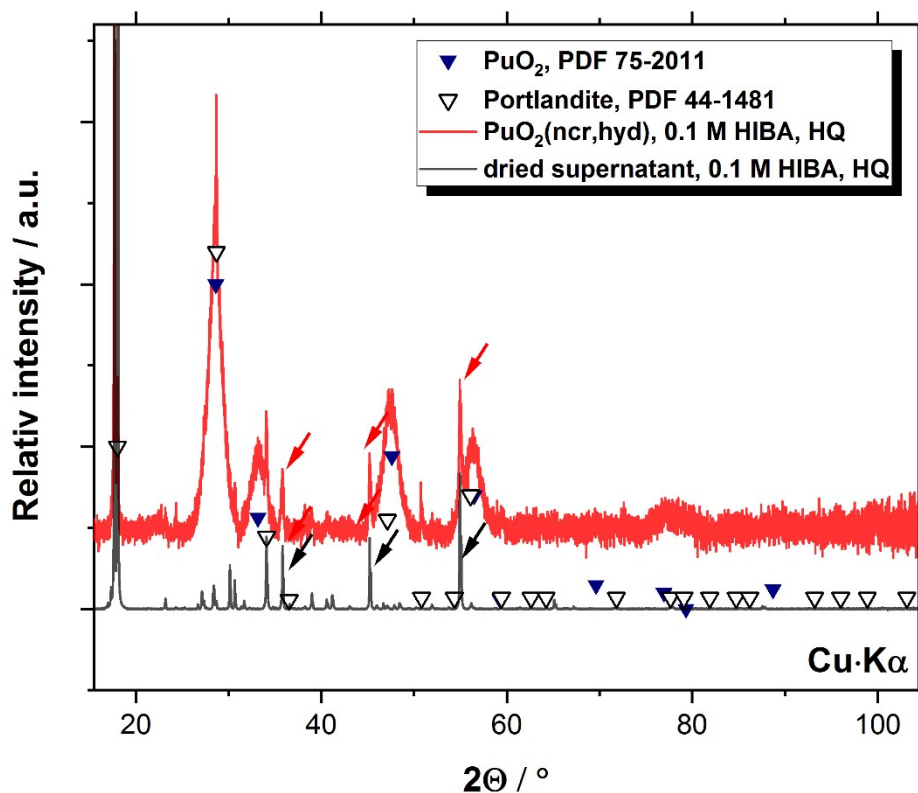

**Figure SI-2.** Red line corresponds to the XRD pattern of the Pu(IV) solid phase after equilibration in the solubility experiments with HIBA at  $[L]_{tot} = 0.1$  M and HQ as redox buffer. Black lines shows the XRD pattern of the supernatant solution dried under Ar conditions, with  $[Ca] \approx 0.02$  M and  $[Pu] \approx 10^{-11}$  M. Symbols reproduce the patterns reported for PuO<sub>2</sub>(cr) (PDF-75-2011) and portlandite (Ca(OH)<sub>2</sub>(cr), PDF-44-1481) reference materials. Red arrows highlight those patterns coincident for the solid phase and dried supernatant, but belonging to neither PuO<sub>2</sub>(cr) nor Ca(OH)<sub>2</sub>(cr).

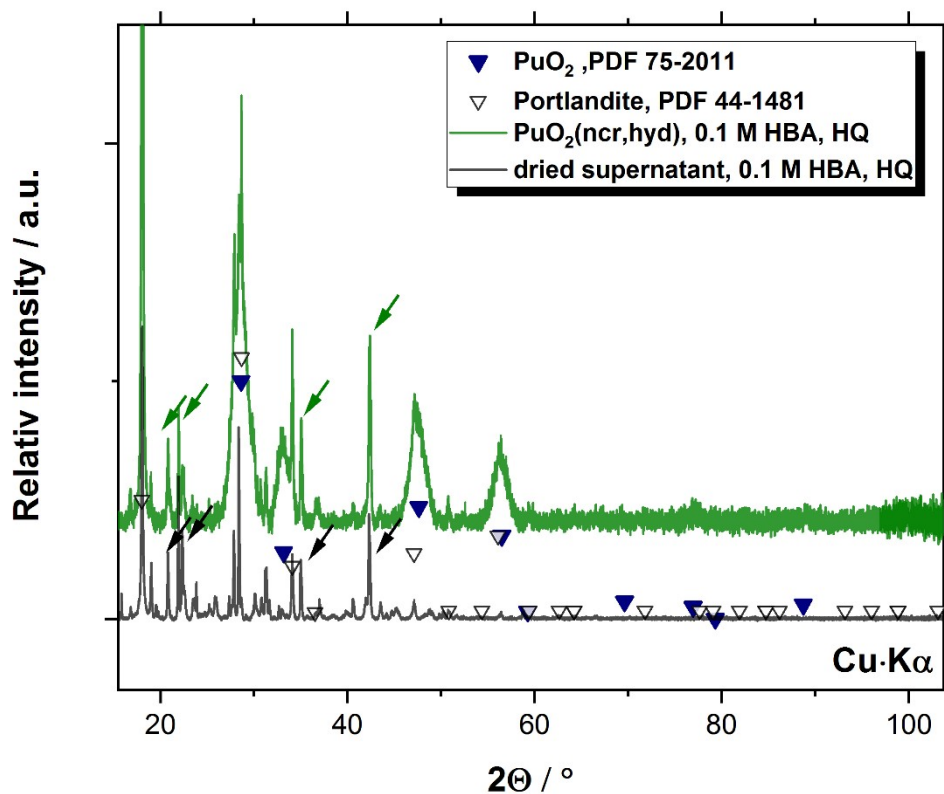

**Figure SI-3.** Green line corresponds to the XRD pattern of the Pu(IV) solid phase after equilibration in the solubility experiments with HBA at  $[L]_{tot} = 0.1$  M and HQ as redox buffer. Black lines shows the XRD pattern of the supernatant solution dried under Ar conditions, with  $[Ca] \approx 0.02$  M and  $[Pu] \approx 10^{-11}$  M. Symbols reproduce the patterns reported for PuO<sub>2</sub>(cr) (PDF-75-2011) and portlandite (Ca(OH)<sub>2</sub>(cr), PDF-44-1481) reference materials. Green arrows highlight those patterns coincident for the solid phase and dried supernatant, but belonging to neither PuO<sub>2</sub>(cr) nor Ca(OH)<sub>2</sub>(cr).
